# Supplementary material for: A qualitative scoping review of the psychosocial aspects of infertility among women across Africa
Source: Research Square preprint supplement (doi:10.21203/rs.3.rs-7919224/v1), 2025-10-24
Supplement: Supplementary file 1 [file 45484826bedba61e361a5495.docx]

## Supplementary File 1: Perceived Fears in Included Studies related to Psychosocial Aspects of Infertility

| **Author(s)** | **Age** | **Country** | **Psychosocial Aspects of Infertility** |
| --- | --- | --- | --- |
| Ofosu-Budu D, Hanninen V 2020 [37] | Unreported | Ghana | - Social strain: Familial pressure (in-laws) to conceive and stigmatisation (abortion and contraceptives are believed to cause infertility) - “*women [are] to blame for childlessness*” - Religion: Some women sought solace in religious explanations (e.g., referring to their fertility as ‘God’s will’ and others turned to traditional medicine to affect the situation/counteract the supernatural causes, such as witchcraft that were perceived to be the causes of their adversity) - Medical pluralism: If one belief system failed, another system is pursued (e.g., traditional healers or herbal medicine and allopathic medical treatments) |
| Tabong PT, Adongo PB 2013 [38] | - Men (35-63) - Women (28-52) | Ghana | - Marital strain (reduced interest in sexual activity and mostly male infidelity reported- woman engaged in extramarital sex incurs greater social consequences (e.g., ‘purification rituals’ must be undertaken before she can cook for or have intercourse with her husband) - Financial strain: Procedures in biomedical health facilities are not covered by the national health insurance scheme. Couples also report being exploited (charged for procedures included in the scheme) - Social strain (stigma and ostracism): Volatile relationships with the marital family (mother-in-law) and community: “*my contribution is valueless… I only listen… because [I] am afraid to be insulted by my colleague women*” [A 52-year old infertile woman in IDI] - Feelings of low self-worth: Infertility exclusively perceived to be the woman’s fault. Having a male child is indispensable. Women felt denied full membership of their husband’s family and their role insecure until they conceive. - Mental health: Depression; frustration of ineffective remedies; fear of stigmatisation; unfairness of feeling ‘denied’ children - Coping strategies: Internal resources (inner strength, self-confidence, true acceptance of their fate and being able to rely on a support structure: “*Sometimes it is really difficult to imagine life without children, but you have to find a way of coping to prevent doing something stupid; this you do by redirecting your energy towards other ventures*” [A participant in FGD with childless women]. Additionally redirecting energy to economic ventures to earn respect in their society enabled women to move forward: “*I had to go to university to do my first degree because I waited several years to become pregnant in vain, after which I proceeded to do a masters degree because you cannot lose in two areas. If you do not have children, get the degrees and you will still be respected*” [A 45-year old infertile woman in IDI] - Infertile couples experience stages similar to the grieving process: denial, anger, bargaining, depression and acceptance. Denial was a common theme and many report fluctuating between anger and denial or living in an angry-denial mood. Denial facilitated by assumption that their parents being fertile meant they would be too. Following this, they would search for solutions whilst bargaining with God or gods depending on their religious belief. - Avoidance: Avoid situations in the community that remind them of their childlessness. - Religion: Take inspiration from bible, praying for a miracle too (e.g., Abraham and Sarah who had to wait until their old age before having children - Genesis 21) |
| Kyei et al. 2021 [42] | - Men: 31-50 - Women: 31-55 | Ghana | - Social status (stigmatisation): Having a child provides women with societal recognition. Women find being the subject of gossip or ridicule from the community as well as in-laws uncomfortable: “*People who don’t know me seem to present my issue as ifI share the same room with them. It’s quite disturbing*” [Joyce] - Worries of the future: Having children was believed as an essential component of inheritance process - women feared property being misappropriated by persons who may not appreciate the process acquiring it: “*It is scary to think that all these may go into the hands of a person who may not value your sweat*” [Gabi] - Concerns of lack of social and economic support: For example, companionship of child(ren) to cope with strenuous events, financial assistance when old or in ill health - Feelings of worry (when encountering families with children, participating in activities with children, social pressure from family - explaining their childlessness) - Feelings of anxiety: Ageing without a child means some women: “*can’t just be calm but be anxious about tomorrow*” [Efua]. Another respondent lamented “*who would take care of me when I am ol*d” [Asantewaa] - Feelings of hopelessness: Some women report feeling their lives are incomplete or empty without children and their marriages a “failure” - Suicidal ideations: “*I am worthless as a woman without my child. One day I nearly took an overdose of amoxycillin to end it all*” [Joyce] - Marital strain: One participant reported her husband had been divorced several times before marrying her as “*the woman doesn’t give birth*” [Fafa] |
| Okantey et al. 2021 [39] | 36-51 | Ghana | - Social strain (stigmatisation): Infertility is associated with promiscuity or health choices, especially women (before they were married): “*your inability to give birth is because you abused your reproductive system through numerous abortions and excessive sex, it is very disgraceful*” [Female, #8, ART] - Social strain (exclusion): Respondents reported being “*not recognised*” and “*not respected*” within Ghanian communities or their family [Female, #10, ART] - Social status: Without children, participants report being labelled and treated unfairly (e.g., “*the inability to have a child is seen as a curse… in my case, my mother always inquired if I have wronged somebody… . l remember a pastor told my mother that my husband and l had done something very sinful to someone and we need to make a sacrifice to God, even though we know we have not offended anyone, we made the sacrifice but nothing happened*” [Female, #3, ART] - Financial strain of ART - Social challenges of ART: Ghanaian society (including spouses, parents) discourages untraditional methods of conception: “*not many people know about it and if they get to know that a child was born through [ART] they would see this child differently from other children who were conceived naturally*” [Female, #9, ART] . Some women identified religious and ethical challenges that prevent ART usage: “*In Ghana, some people think IVF is fake, not natural, it is not of God and so lots of people frown against it, and they do everything possible to discourage persons”* - Mental health implications of ART: Women express feelings of stress and trauma of ART: “I *had tried the procedure about three times but wasn’t successful, l waited for a year after the last one and tried again, l became pregnant at the fourth attempt… my brother, l went through stress and psychological trauma till l delivered*” [Female, #8, ART] - Medical complications of using ART: Participants commonly reported side effects such as ovarian hyperstimulation, headaches, dizziness and drowsiness. Despite the numerous challenges, women expressed they felt the end justified the means: “*parents go the extra mile to get them in and so when they come, I think they are even luckier and should be treasured more than the normal babies who just popped into your womb and was delivered*” [Female, #14, ART] - Family lineage and inheritance: Communities practice the patrilineal mode of inheritance to keep family lineage in perpetual existence. Respondents believe that without children, they will not qualify to be ancestors as their family names will be “*forgotten*” (not in perpetual existence) after their demise [Female, #16, ART] - Financial security: Children are an important source of social security in old age (residential and nursing homes as well as pensions are not enough/available) |
| Tabong PT, Adongo PB 2013 [35] | - Men: 35-63 - Women: 28-52 | Ghana | - Symbol of achievement: At old age, grandchildren act as companions and as a parent, they are believed to be sources of joy who ensure respect from community members: “*we respect people with children in this community especially male children*” {A FGD female participant] - Family lineage and inheritance - Financial security: More (male) assistance at home and in farm, generates more produce and ultimately more revenue for the family. This practice is essential as respondents state the increasing nucleation of families has caused a break in the extended family system, so the pursuit of children is significant due to the future security provided in old age - Religious reasons: Respondents believe as a failure to have children is against the holy books (Bible and Koran), a family cannot receive the blessings o God. - Ritual rights: Fear of not being able to perform funeral rituals/not attracting attention within the community. This is pronounced in women whose reproductive role becomes the exclusive right of their husband. Not having children implies she has instigated a loss to her husband’s family. Childbirth is also part of a woman’s rites of passage to womanhood - without it, she is not considered fully a woman (rituals performed equivalent to those performed for a deceased child) - Social strain (stigmatisation): Infertility assumed to be caused by promiscuity/previous contraceptive use/STIs/abortions/excessive alcohol/smoking. Some reported that there is a widely held belief that infertility results from gods and ancestors punishing those who break the codes of marriage. Some Christian participants reported association of masturbation with infertility (a form abortion) - Supernatural: Belief that some infertile women are witches/have curses placed on them by associates - if they live until old age, they are believed to have exchanged the death of their child/womanhood for a longer life/wealth which can only be reversed by rituals undertaken by traditional medical practitioners or soothsayers. Leads to community exclusion and in some cases, physical abuse at public gatherings: “*A childless woman after killing all the children in her womb recently took the head of a child in my community and was beaten until she returned the head. She has subsequently been banished from the community*” [An FGD female participant]. Infertility was not believed by community to be a penalty of being a ‘wizard’ for men - Marital impacts: Women being blamed for infertility leads to high-risk behaviours (males engage in extramarital relationships to prove fertility, including polygamy as the ability to beget male children/maintain family lineage generally considered male parter’s role. Some wives in these polygamous relationships expressed being only incubators - belief that gender is dependent on their male partner is based on cultural practice of a deceased person’s male child harvesting a stick, ‘*Kpiendaa*’, which symbolises the deceased person’s acceptance in the ancestral world: “*I told my husband that he cannot give birth to male children but he refused and went in for a second and third wife, but see we are all giving birth to females’*’ [First wife of a man who is married to multiple wives in IDI] - Help-seeking behaviours: Women reported seeking treatment in combination or sequence: traditional/religious healers as well medical treatment: "*I am using both traditional and orthodox medicine, but I first went to the herbalist*” [A 38-year old infertile woman in IDI] |
| Fledderjohann JJ 2012 [30] | - Women (21-48) | Ghana | - Women felt burdened with a disproportionate share of the blame for infertility and faced greater social consequences than their partners mainly because they exhibit the physical signs of pregnancy so are identified infertile if a child is not conceived. Familial and marital pressure to conceive resulted in emotional strain ranging from loneliness, insomnia and worry to stress and depressive symptoms. Physical ailments ranging from headaches and body aches reported as reactions to ART - Marital instability: Women report of fears of infidelity, divorce or the potential of their partners engaging in polygamy to prove their fertility with other sexual partners. For women, extramarital partnerships are secret and are undertaken to preserve their husband’s reputation (in the case of male infertility) - Domestic violence: Rare cases stemming from pressure to have children from the marital family - Social exclusion (ostracism): Infertile women are discouraged from interacting or disciplining children in the community and being involved in communal conversations of children. Men were reported to deflect stigma by assigning blame on their female partner - Mental health: Symptoms related to depression (insomnia, extended periods of crying and unhappiness) - Strained social interactions: Duplicitous friendships, insults, mocking: “*we are in a family house, there are other married women in each house who have their own children. The way they talk to her, politely, but to me they talk to me very harsh and in an immoral manner, in a provocative manner*” [Age 35 years, infertile, childless] |
| Ofosu-Budu D, Hanninen V 2020 [36] | - Women: 19-43 | Ghana | - Avoidance: Some participants revealed a desire to migrate to avoid pain and discomfort from in-laws and community: “*I don’t have peace of mind, so when I go to the school… I usually stay back to relax because it is very uncomfortable at home… it’s either my husband understands the issue at hand for us to relocate to a different place, away from the family house*” - Marital strain: Some women reported being stigmatised by their husbands. Some women preferred to remain married out of fear of the sigma linked with divorce. Some women stated their husbands informed their own families to avoid pressures on their wives: “*my husband himself told them the problem… he didn’t want any pressure to be coming from his family.. we are just okay by ourselves… he went forward to the family and informed them that the problem was his, so they should not worry me about anything*” [A 30-year-old, Ashanti region] - Social strain (stigmatisation): Some women expressed needing to pretend to have children to avoid stigma among friends as regardless of contributions in society, community viewed infertile women as “*very useless*” [A 35-year-old, Northern region] - Social strain: Maltreatment (in-laws or co-wives) “*[my father in-law] made an attempt to kick me out of the house simply because the second wife claims whenever she sees me… her heart beats arrhythmically… and her blood pressure rises, so she suspects I am likely to harm her in one way or the other*” [A 32-year-old, Northern region] - Emotional support from family members that held the idea that infertility is an obstacle to overcome but encouraging them in their effort to conceive (either through a new romantic partnership or by devoting more time): “*Right now, it is my mother who sometimes advises me to stop working and focus on getting a child*” [A 45-year-old, Ashanti region] |
| Nachinab et al. 2019 [41] | 24-40 | Ghana | - Family lineage and inheritance: Some participants report husbands prefer marrying a second wife to obtain biological children: “*For my husband he will not agree. “He has children with my rival so he will not agree to bring in a child that is not his*” [Adwoa]. Additionally, high value is placed on blood relations as bearing the surname of a parent and legitimacy relating to inheritance property is exclusively reserved for biological (male) children in Northern Ghana. - Psychological dissatisfaction: Some women express that adopting a child is not believed to make a difference to the pain of infertility: “*Nothing will change in my life if I adopt a child… deep down your heart it will not feel like it is your own child. The people in the family will not see you as somebody with her own child*” [Adwoa] - Community expectations: They believe this alternative creates an impression (to their community) that that they have been told they will never have their own children: “*adopting a child will not satisfy me… People will look at you and think you have been told that you can no longer deliver and that is why you are bringing a child to satisfy yourself*” [Serwa] - Social strain (family and community dynamics): Family influence may affect the likelihood of adoption (e.g., discrimination against adopted child: concerns relating to not allowing the adopted child to inherit property - high value placed on blood relations: “*The family will not treat an adopted child well because they like blood relations. They will see the child to be an alien… The way people will treat the child you will be having problems… always*” [Afia] - Women felt burdened with a disproportionate share of the blame for infertility from family that were reported to encourage their husband married more wives to increase his chances of fatherhood: “*In Islam a man can marry more than one wife so the family will prefer my husband going for a second wife. This is because the local people never think that the problem could also be coming from the man. They always think it is the woman*” [Agyeiwa] |
| Asante-Afari et al. 2022 [43] | - Women: 30-50+ | Ghana | **Before Childbirth**   - Family lineage and inheritance: A respondent expressed how her in-laws put pressure on her husband to marry another wife for children: “*My husband is a Traditional leader and customs demand that he gets a child preferably a son to succeed him. As a result, his family married another woman for my husband just to have a child so they could preserve the family’s lineage*” [Respondent 1] - Supernatural: One respondent reported that her husband regarded her inability to initially conceive as a punishment from God: “*My husband quarrelled with me all the time and told me that my situation was a punishment from God… [he] now turns against me because of my inability to have a child*” [Respondent 4] - Marital impact: Before childbirth, some women reported support from husbands: “*My husband was a pillar behind me when his family decided to throw me out o the marriage. He accepted the blame that our inability to have a child was his fault just to save the marriage*” [Respondent 23]. Others revealed they experienced spousal abuse: “*I have never known peace for the past 9 years without a child. He threatens me with divorce anytime there is a misunderstanding*” [Respondent 17]   **After Childbirth**   - Social status: One participant responded that motherhood helped herself and her husband gain recognition: “*When people see me and greet me I feel so good… There were situations where I intentionally avoided greeting people because they may ask about the health of my children which I did not have by then*” [Respondent 27] - Social integration: The entire community and family members celebrated the couples following childbirth, which also had a beneficial effect on wellbeing: “ I feel very good and proud in my community because I am counted among mothers. What is better than this?” [Respondent 10]. Additionally, relationships with in-laws became better: “My in-laws who were against me have apologised to me” [Respondent 36] - Social strain: Other women reported that a successful childbirth worsened the challenges with their families and communities: “Could you believe that when I delivered after the death of my husband, my family and in-laws accused me of using my husband for the birth ritual?” [Respondent 25]. - Mental health: Motherhood had a beneficial impact on respondents: “*Being a mother is the sweetest…. I felt sick and surprisingly my little girl pulled the rosary and prayed for me. At this point, I realised that someone cares about me*” [Respondent 18] - Marital impact: Women reported the attitudes of their husbands improved after childbirth: “*My husband has stopped seeing other women and the care for the child and I is great*” [Respondent 30] |
| Donker et al. 2017 [40] | 27-42 | Ghana | - Loneliness: Particularly when returning home from work without the sounds of children: “*I experience much loneliness especially on days when my husband isn’t around. I could cry my heart out until I got consolation from him, I did not stop crying*” - Social strain (exclusion): Maltreatment from in-laws: “*My sister-in-law uses my inability to have children as grounds to hurt my feelings whenever we have a misunderstanding in order to silence me*” - Anxiety: Ageing without a family, being the only one of their friends without children, fears of losing husband (polygamy): “*Being a Muslim, you know that in our tradition, a man can marry more than one (1) wife and because of this, sometimes I feel if I do not try my very best to get myself pregnant, my husband will one day go in for another woman to give him children although he has not expressed that to me yet*” - Depression: Feelings of humiliation from colleagues and friends (workplace and home) through unfair treatment or because they speak about their children in her presence: “*I am always depressed. After three (3) whole years of marriage, the society expects that I either get pregnant or at least carry my own baby… I have failed to achieve these, anybody at all speaks to me anyhow without regard*” - Lack of concentration: “*I sometimes lose concentration to the extent that, I even forget to eat at times*” - Worry: Self-blame (punishment from God) and being blamed by husband: “*I am very worried because I do not know what I have done to Allah to incur such punishment*” - Reduced sexual satisfaction: Futility of intercourse if it does not result in a child: “*all these years of love making, nothing really came out of it… I always experience reduced sexual satisfaction*” |
